# Supplementary material
Source: ML conference proceedings conference paper supplement (https://openaccess.thecvf.com/content/ICCV2023/html/Yao_Towards_Understanding_the_ICCV_2023_paper.html)
Supplement: Supplementary file 1 [file Yao_Towards_Understanding_the_ICCV_2023_supplemental.pdf]

## A. Proof of Eq. 9

$$\begin{aligned}
& \frac{1}{L} \sum_{v \in V} \phi^m(v) \\
&= \frac{1}{L} \sum_{v \in V} E_{S \subseteq V \setminus \{v\}, |S|=m} [f(S \cup \{v\}) - f(S)] \\
&= \frac{1}{L} \sum_{v \in V} \frac{m!(L-1-m)!}{(L-1)!} \sum_{S \subseteq V \setminus \{v\}, |S|=m} [f(S \cup \{v\}) - f(S)] \\
&= \frac{1}{L} \frac{m!(L-1-m)!}{(L-1)!} \sum_{S \subseteq V, |S|=m+1} [f(S) - \sum_{v \in S} f(S \setminus \{v\})] \\
&= \frac{(m+1)!(L-1-m)!}{L!} \sum_{S \subseteq V, |S|=m+1} \left[ \frac{1}{m+1} f(S) - \frac{1}{m+1} \sum_{v \in S} f(S \setminus \{v\}) \right] \\
&= \frac{1}{m+1} E_{S \subseteq V, |S|=m+1} [f(S) - \sum_{v \in S} f(S \setminus \{v\})]
\end{aligned} \tag{10}$$

## B. Discussion about the State-of-the-art

To further validate our findings, we provided analyses about the SOTA method in [14] *w.r.t.* our proposed hypotheses. Following the methods in the main paper, results in Tab. 3 show that when aligned with the same backbone, *CADDM* [14] with better generalization abilities tended to encode low-order interactions with fewer negative contributions (*i.e.*, larger values of  $D^m$ , which were averaged among different images.) and less strength (*i.e.*, smaller values of  $\rho^m$ .), which were consistent with our previous analyses<sup>1</sup>.

| Backbone  | Model             | Train | Test          | Manipulation   |                     |                |                     |                |                     |                |                     |                |                     |
|-----------|-------------------|-------|---------------|----------------|---------------------|----------------|---------------------|----------------|---------------------|----------------|---------------------|----------------|---------------------|
|           |                   | FF++  | Celeb-DF (v2) | DeepFakes      |                     | FaceShifter    |                     | Face2Face      |                     | FaceSwap       |                     | NeuralTextures |                     |
|           |                   | V-AUC | V-AUC         | $D^m \uparrow$ | $\rho^m \downarrow$ |
| ResNet-18 | <i>Base</i>       | 0.998 | 0.658         | -0.023         | 0.049               | -0.022         | 0.048               | -0.022         | 0.048               | -0.021         | 0.047               | -0.022         | 0.049               |
|           | <i>Base+DA</i>    | 0.998 | 0.776         | -0.011         | 0.044               | -0.013         | 0.045               | -0.012         | 0.045               | -0.011         | 0.045               | -0.012         | 0.045               |
|           | <i>CADDM</i> [14] | 0.998 | 0.890         | <b>-0.008</b>  | <b>0.028</b>        | <b>-0.006</b>  | <b>0.029</b>        | <b>-0.008</b>  | <b>0.028</b>        | <b>-0.008</b>  | <b>0.028</b>        | <b>-0.008</b>  | <b>0.028</b>        |
| ResNet-34 | <i>Base</i>       | 0.999 | 0.641         | -0.050         | 0.102               | -0.049         | 0.102               | -0.049         | 0.102               | -0.050         | 0.103               | -0.049         | 0.102               |
|           | <i>Base+DA</i>    | 0.998 | 0.801         | -0.018         | 0.068               | -0.021         | 0.068               | -0.021         | 0.068               | -0.023         | 0.069               | -0.021         | 0.069               |
|           | <i>CADDM</i> [14] | 0.997 | 0.912         | <b>-0.011</b>  | <b>0.067</b>        | <b>-0.011</b>  | <b>0.066</b>        | <b>-0.011</b>  | <b>0.067</b>        | <b>-0.012</b>  | <b>0.067</b>        | <b>-0.011</b>  | <b>0.067</b>        |
| Xception  | <i>Base</i>       | 0.998 | 0.585         | -0.039         | 0.095               | -0.039         | 0.095               | -0.038         | 0.095               | -0.038         | 0.095               | -0.037         | 0.094               |
|           | <i>Base+DA</i>    | 0.998 | 0.815         | -0.010         | 0.056               | -0.018         | 0.057               | -0.012         | 0.058               | -0.016         | 0.059               | -0.010         | 0.057               |
|           | <i>CADDM</i> [14] | 0.999 | 0.867         | <b>-0.009</b>  | <b>0.039</b>        | <b>-0.012</b>  | <b>0.040</b>        | <b>-0.011</b>  | <b>0.039</b>        | <b>-0.012</b>  | <b>0.049</b>        | <b>-0.009</b>  | <b>0.039</b>        |

Table 3. Verifying hypotheses on the SOTA method *CADDM* [14]. Here *DA* denotes data augmentations. *Base* denotes the model trained without data augmentations. Results show that *CADDM* exhibited better generalization abilities, when encoding low-order interactions with less negative contributions and less strength, consistent with our proposed hypotheses.

<sup>1</sup>To gain better comparisons, we calculated the proposed metrics  $D^m$  and  $\rho^m$  in a smaller range of lower-order interactions (*i.e.*,  $m < 0.1n$ ) for the backbone of Xception here, which may cause values of metrics to be different from the main paper for *Base* and *Base+DA*.
